# Supplementary material
Source: publisher site journal article supplement (https://www.dovepress.com/article/372430)
Supplement: Supplementary file 1 [file get_supplementary_file.php]

# **Quality and characteristics of 4,241 case reports of lactic acidosis in metformin users reported to a large pharmacovigilance database**

**Kerstin Brand,<sup>1</sup> Judith Schlachter,<sup>2</sup> Caroline Foch,<sup>3</sup> Emmanuelle Boutmy<sup>4</sup>**

1. Global Medical Affairs, Merck Healthcare KGaA, Darmstadt, Germany.
2. Global Patient Safety, Merck Healthcare KGaA, Darmstadt, Germany.
3. Global Epidemiology, Merck Healthcare KGaA, Darmstadt, Germany.
4. Global Biostatistics, Merck Healthcare KGaA, Darmstadt, Germany.

## **Online data supplement**

**Online Supplementary Table 1.** Categorical analysis of key variables according to the recorded dose of metformin.

|                           | Missing data<br>(n=1,544) | Daily metformin dose (mg) category |                                         |                                     |                                        |                                      |
|---------------------------|---------------------------|------------------------------------|-----------------------------------------|-------------------------------------|----------------------------------------|--------------------------------------|
|                           |                           | Low<br>(<1,000)<br>(n=388)         | Medium<br>(1,000 to 2,000)<br>(n=1,040) | High<br>(2,000 to 2,550)<br>(n=708) | Maximum<br>(2,550 to 3,000)<br>(n=360) | Above maximum<br>(>3,000)<br>(n=201) |
| Plasma metformin (mg/L)   |                           |                                    |                                         |                                     |                                        |                                      |
| Missing                   | 1,308 (84.7)              | 347 (89.43)                        | 882 (84.81)                             | 572 (80.8)                          | 271 (75.3)                             | 152 (75.6)                           |
| Up to 4.99                | 84 (5.4)                  | 15 ( 3.87)                         | 29 ( 2.79)                              | 43 (6.1)                            | 31 (8.6)                               | 26 (12.9)                            |
| 5 to <20                  | 54 (3.4)                  | 2 ( 0.52)                          | 32 ( 3.08)                              | 29 (4.1)                            | 14 (3.9)                               | 6 (3.0)                              |
| 20 to <50                 | 78 (5.1)                  | 5 ( 1.29)                          | 27 ( 2.60)                              | 56 (7.9)                            | 37 (10.3)                              | 12 (6.0)                             |
| ≥50                       | 20 (1.3)                  | 7 ( 1.80)                          | 12 ( 1.15)                              | 8 (1.1)                             | 7 (1.9)                                | 5 (2.5)                              |
| Plasma lactate (mmol/L)   |                           |                                    |                                         |                                     |                                        |                                      |
| Missing                   | 862 (55.8)                | 162 (41.8)                         | 396 (38.1)                              | 270 (38.1)                          | 99 (27.5)                              | 73 (36.3)                            |
| <2.5 <sup>a</sup>         | 153 (9.9)                 | 37 (9.5)                           | 115 (11.1)                              | 87 (12.3)                           | 52 (14.4)                              | 53 (26.4)                            |
| 2.5 to 5.0 <sup>b</sup>   | 258 (16.7)                | 56 (14.4)                          | 207 (19.9)                              | 169 (23.9)                          | 128 (35.6)                             | 32 (15.9)                            |
| 5 to <10 <sup>c</sup>     | 76 (4.9)                  | 40 (10.3)                          | 110 (10.6)                              | 53 (7.5)                            | 17 (4.7)                               | 12 (6.0)                             |
| 10 to <20 <sup>d</sup>    | 144 (9.3)                 | 55 (14.2)                          | 149 (14.3)                              | 96 (13.6)                           | 55 (15.3)                              | 23 (11.4)                            |
| ≥20 <sup>e</sup>          | 51 (3.3)                  | 38 (9.8)                           | 63 (6.1)                                | 33 (4.7)                            | 9 (2.5)                                | 8 (4.0)                              |
| pH                        |                           |                                    |                                         |                                     |                                        |                                      |
| Missing                   | 956 (61.92)               | 229 (59.0)                         | 529 (50.9)                              | 318 (44.9)                          | 109 (30.2)                             | 61 (30.4)                            |
| <7.0 <sup>f</sup>         | 295 (19.1)                | 93 (24.0)                          | 297 (28.6)                              | 174 (24.6)                          | 107 (29.7)                             | 78 (38.8)                            |
| 7.0 to <7.35 <sup>g</sup> | 8 (0.5)                   | 5 (1.3)                            | 14 (1.4)                                | 5 (0.7)                             | 1 (0.3)                                | 3 (1.5)                              |
| 7.35 to 7.45 <sup>h</sup> | 267 (17.3)                | 47 (12.11)                         | 172 (16.5)                              | 191 (27.0)                          | 136 (37.8)                             | 51 (25.4)                            |
| ≥7.45 <sup>i</sup>        | 18 (1.2)                  | 14 (3.6)                           | 28 (2.7)                                | 20 (2.8)                            | 7 (1.9)                                | 8 (4.0)                              |

Categories of plasma lactate: <sup>a</sup>Normal; <sup>b</sup>hyperlactataemia; <sup>c</sup>low lactic acidosis; <sup>d</sup>high lactic acidosis; <sup>e</sup>extreme lactic acidosis. Categories of pH: <sup>f</sup>massive acidosis; <sup>g</sup>acidosis; <sup>h</sup>normal; <sup>i</sup>alkalosis. Figures in parentheses are percentages of the corresponding metformin dose category. Metformin dosage categories were determined arbitrarily.

**Online Supplementary Table 2.** Spearman correlation coefficients (rho, 95% CI) for all correlations between metformin dosage, plasma metformin, plasma lactate, pH and GFR.

|                                   | All cases               | LA subpopulation <sup>a</sup> | MaLA subpopulation <sup>b</sup> | Metformin dose ≤3000 mg <sup>c</sup> | Metformin dose >3000 mg <sup>c</sup> |
|-----------------------------------|-------------------------|-------------------------------|---------------------------------|--------------------------------------|--------------------------------------|
| Metformin dose x plasma metformin | 0.29<br>(0.2, 0.38)     | 0.26<br>(0.14, 0.38)          | 0.19<br>(0.05, 0.32)            | 0.26<br>(0.17, 0.34)                 | 0.39<br>(0.1, 0.6)                   |
| Metformin dose x plasma lactate   | 0.22<br>(0.18, 0.27)    | 0.13<br>(0.06, 0.19)          | 0.17<br>(0.04, 0.3)             | 0.19<br>(0.14, 0.23)                 | 0.28<br>(0.11, 0.43)                 |
| Metformin dose x pH               | -0.17<br>(-0.22, -0.12) | -0.14<br>(-0.2, -0.08)        | -0.15<br>(-0.27, -0.04)         | -0.22<br>(-0.28, -0.17)              | -0.12<br>(-0.29, 0.06)               |
| Plasma metformin x plasma lactate | 0.35<br>(0.27, 0.43)    | 0.25<br>(0.16, 0.34)          | 0.26<br>(0.17, 0.36)            | 0.3<br>(0.19, 0.4)                   | 0.63<br>(0.4, 0.78)                  |
| Plasma metformin x pH             | -0.45<br>(-0.52, -0.37) | -0.4<br>(-0.47, -0.32)        | -0.35<br>(-0.43, -0.26)         | -0.43<br>(-0.52, -0.34)              | -0.63<br>(-0.78, -0.41)              |
| Plasma lactate x pH               | -0.57<br>(-0.61, -0.54) | -0.52<br>(-0.56, -0.48)       | -0.47<br>(-0.55, -0.39)         | -0.61<br>(-0.65, -0.56)              | -0.57<br>(-0.69, -0.41)              |
| Metformin dose x GFR              | -0.23<br>(-0.28, -0.18) | -0.16<br>(-0.24, -0.08)       | -0.02<br>(-0.17, 0.14)          | -0.32<br>(-0.37, -0.26)              | 0.42<br>(0.22, 0.59)                 |
| Plasma metformin x GFR            | -0.32<br>(-0.4, -0.23)  | -0.29<br>(-0.4, -0.18)        | -0.14<br>(-0.27, -0.01)         | -0.42<br>(-0.51, -0.31)              | 0.06<br>(-0.29, 0.43)                |
| Plasma lactate x GFR              | -0.2<br>(-0.25, -0.15)  | -0.08<br>(-0.15, -0.02)       | 0.03<br>(-0.09, 0.16)           | -0.27<br>(-0.33, -0.21)              | -0.11<br>(-0.35, 0.14)               |
| pH x GFR                          | 0.25<br>(0.2, 0.3)      | 0.21<br>(0.15, 0.28)          | 0.13<br>(0.01, 0.25)            | 0.3<br>(0.24, 0.36)                  | 0.12<br>(-0.12, 0.34)                |

Subpopulations (see Methods): <sup>a</sup>sufficient data presented to correctly diagnose lactic acidosis (LA); <sup>b</sup>sufficient data presented to correctly diagnose metformin-associated LA (MaLA); <sup>c</sup>Recorded metformin dose at prior to the acidotic event. Table cells where rho exceeds an arbitrarily defined value of 0.3 and 0.4 are shaded to aid visibility.

**Online Supplementary Table 3.** Univariate predictors of mortality.

a) All cases with sufficient data

| <b>Plasma metformin (mg/L)</b> | <b>OR (95% CI)</b> | <b>p</b> |
|--------------------------------|--------------------|----------|
| <2.5                           | Reference          | –        |
| 2.5–4.99                       | 1.73 (0.87, 3.44)  | 0.12     |
| 5– <10                         | 0.92 (0.44, 1.88)  | 0.83     |
| 10– <20                        | 1.20 (0.66, 2.21)  | 0.55     |
| 20– <50                        | 0.73 (0.43, 1.24)  | 0.24     |
| ≥50                            | 1.29 (0.75, 2.23)  | 0.36     |

| <b>Metformin dose (mg)</b> | <b>OR (95% CI)</b> | <b>p</b> |
|----------------------------|--------------------|----------|
| <1,000                     | Reference          | –        |
| 1,000–2,000                | 1.16 (0.88, 1.55)  | 0.30     |
| 2,000–2,550                | 1.12 (0.83, 1.51)  | 0.47     |
| 2,550–3,000                | 0.90 (0.63, 1.29)  | 0.57     |
| >3,000                     | 0.65 (0.41, 1.03)  | 0.07     |
| –                          |                    |          |

| <b>Plasma lactate (mmol/L)</b> | <b>OR (95% CI)</b> | <b>p</b> |
|--------------------------------|--------------------|----------|
| <2.5 mmol/L                    | Reference          | –        |
| 2.5– <5.0                      | 0.91 (0.43, 2.02)  | 0.81     |
| 5.0– <10.0                     | 1.90 (1.01, 3.89)  | 0.06     |
| 10.0– <20.0                    | 4.74 (2.64, 9.43)  | <0.001   |
| 20.0–50.0                      | 6.99 (3.85, 14.02) | <0.001   |
| >50                            | 6.91 (2.81, 17.40) | <0.001   |

| <b>pH</b>  | <b>OR (95% CI)</b> | <b>p</b> |
|------------|--------------------|----------|
| 7.35– 7.45 | Reference          | –        |
| ≥7.45      | 3.05 (1.49, 7.35)  | 0.0053   |
| 7–7.35     | 2.03 (0.56, 6.82)  | 0.2555   |
| <7         | 5.56 (2.73, 13.38) | <0.001   |

b) The LA subpopulation

| <b>Plasma metformin (mg/L)</b> | <b>OR (95% CI)</b> | <b>p</b> |
|--------------------------------|--------------------|----------|
| <2.5                           | Reference          | –        |
| 2.5–4.99                       | 3.40 (1.20, 10.09) | 0.0228   |
| 5– <10                         | 1.61 (0.63, 4.17)  | 0.3203   |
| 10– <20                        | 1.33 (0.57, 3.14)  | 0.5159   |
| 20– <50                        | 0.66 (0.32, 1.38)  | 0.2530   |
| ≥50                            | 1.13 (0.55, 2.42)  | 0.7408   |

| <b>Metformin dose (mg)</b> | <b>OR (95% CI)</b> | <b>p</b> |
|----------------------------|--------------------|----------|
| <1,000                     | Reference          | –        |
| 1,000–2,000                | 0.86 (0.54, 1.39)  | 0.524    |
| 2,000–2,550                | 0.82 (0.51, 1.35)  | 0.431    |
| 2,550–3,000                | 0.60 (0.35, 1.02)  | 0.056    |
| >3,000                     | 0.29 (0.14, 0.60)  | 0.001    |

| <b>Plasma lactate (mmol/L)</b> | <b>OR (95% CI)</b> | <b>p</b> |
|--------------------------------|--------------------|----------|
| <2.5 mmol/L                    | –                  | –        |
| 2.5– <5.0                      | –                  | –        |
| 5.0– <10.0                     | Reference          | –        |
| 10.0– <20.0                    | 2.51 (1.73, 3.72)  | <0.001   |
| 20.0–50.0                      | 4.38 (2.97, 6.58)  | <0.001   |
| >50                            | 3.19 (1.31, 7.30)  | 0.0075   |

| <b>pH</b> | <b>OR (95% CI)</b> | <b>p</b> |
|-----------|--------------------|----------|
| 7.35–7.45 | –                  | –        |
| ≥7.45     | –                  | –        |
| 7–7.35    | Reference          | –        |
| <7        | 1.52 (1.19, 1.93)  | <0.001   |

c) The MaLA subpopulation

| <b>Plasma metformin (mg/L)</b> | <b>OR (95% CI)</b> | <b>p</b> |
|--------------------------------|--------------------|----------|
| <2.5                           | –                  | –        |
| 2.5–4.99                       | –                  | –        |
| 5–<10                          | Reference          | –        |
| 10–<20                         | 0.89 (0.35, 2.27)  | 0.806    |
| 20–<50                         | 0.44 (0.20, 1.01)  | 0.047    |
| ≥50                            | 0.76 (0.34, 1.77)  | 0.515    |

| <b>Metformin dose (mg)</b> | <b>OR (95% CI)</b> | <b>p</b> |
|----------------------------|--------------------|----------|
| <1,000                     | Reference          | –        |
| 1,000–2,000                | 0.36 (0.08, 1.48)  | 0.154    |
| 2,000–2,550                | 0.31 (0.07, 1.29)  | 0.106    |
| 2,550–3,000                | 0.41 (0.09, 1.70)  | 0.217    |
| >3,000                     | 0.18 (0.03, 0.89)  | 0.037    |

| <b>Plasma lactate (mmol/L)</b> | <b>OR (95% CI)</b> | <b>p</b> |
|--------------------------------|--------------------|----------|
| <2.5 mmol/L                    | –                  | –        |
| 2.5–<5.0                       | –                  | –        |
| 5.0–<10.0                      | Reference          | –        |
| 10.0–<20.0                     | 4.77 (1.83, 16.38) | 0.0042   |
| 20.0–50.0                      | 7.54 (2.85, 26.11) | <0.001   |
| >50                            | 4.08 (0.18, 42.19) | 0.2666   |

| <b>pH</b> | <b>OR (95% CI)</b> | <b>p</b> |
|-----------|--------------------|----------|
| 7.35–7.45 | –                  | –        |
| ≥7.45     | –                  | –        |
| 7–7.35    | Reference          | –        |
| <7        | 1.17 (0.73, 1.89)  | 0.53     |

**Online Supplementary Fig. 1.** Missingness map for laboratory variables related to the diagnosis of lactic acidosis or metformin-associated lactic acidosis.

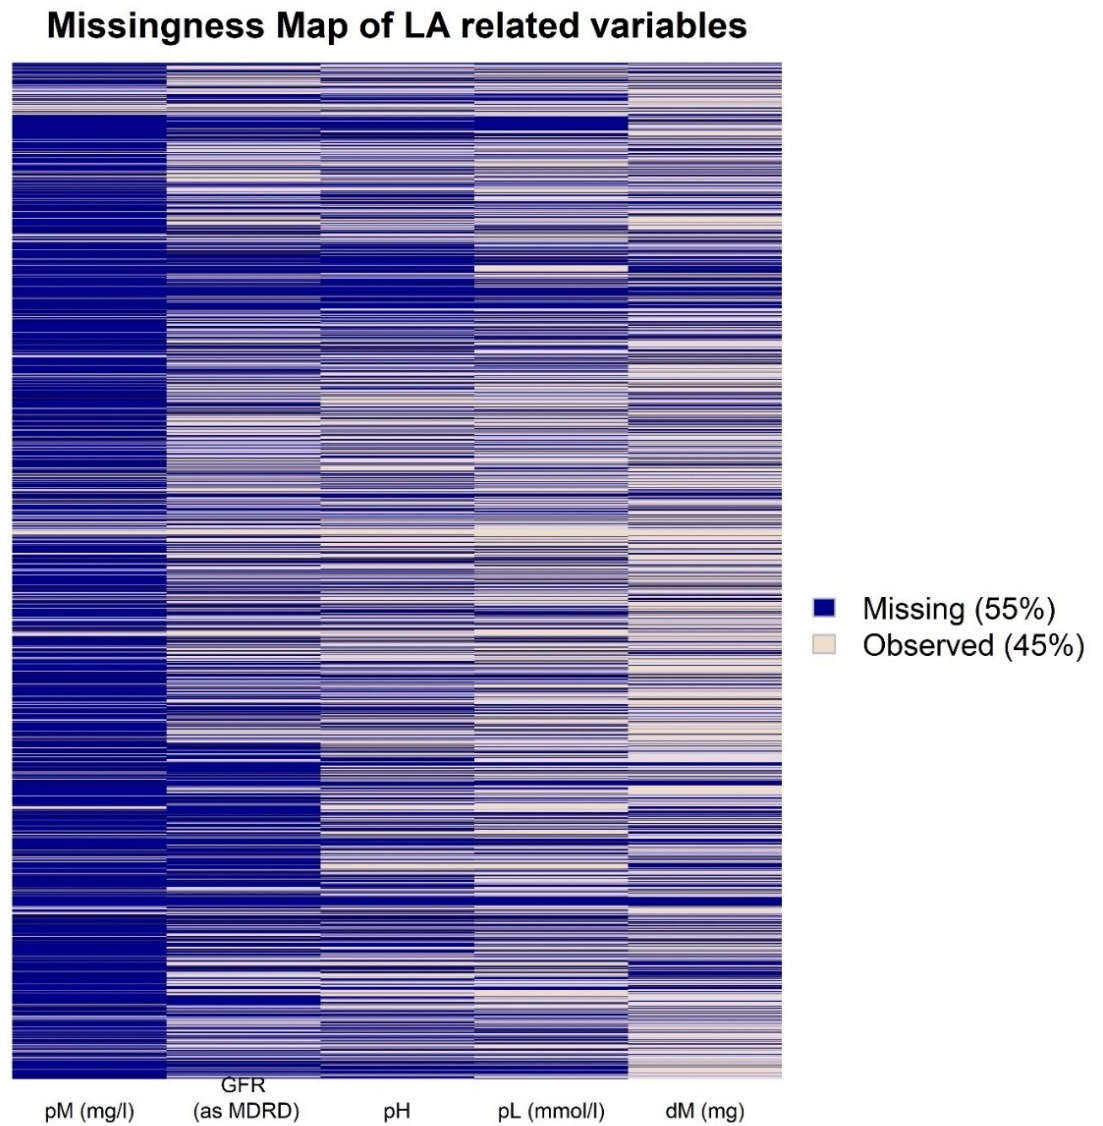

**Online Supplementary Fig. 2.** Odds ratios for death from logistic regression models adjusted on key variables related to lactic acidosis (LA) or metformin-associated lactic acidosis (MaLA) as per index of exposure.

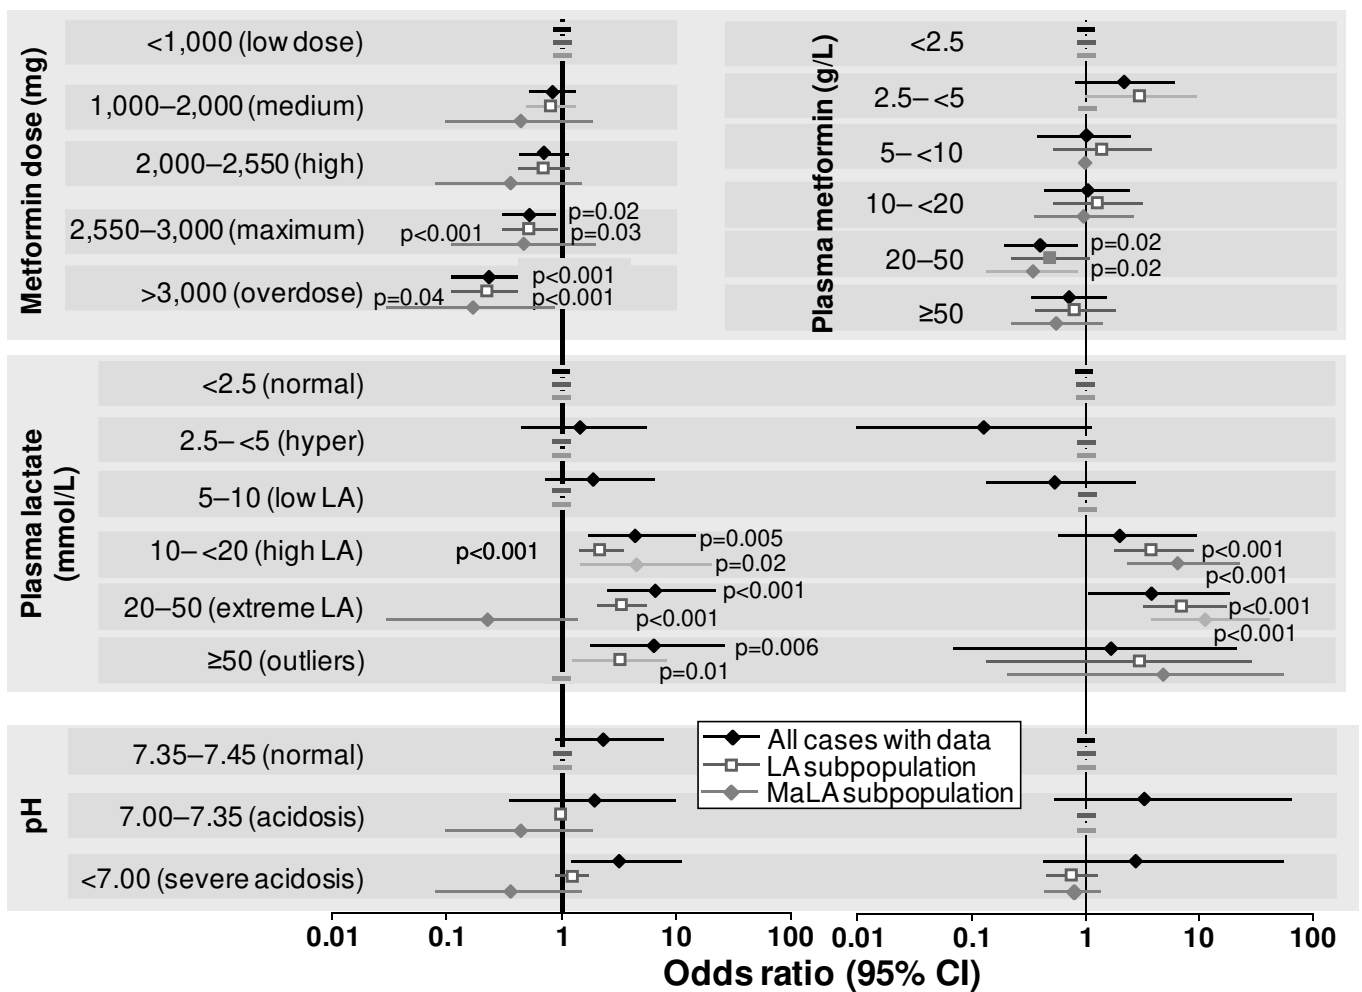

Figures on the left were adjusted on metformin dose, plasma lactate and pH; Figures on the right were adjusted on plasma metformin, plasma lactate and pH. Null values (–) were either excluded from subpopulations due to their entry criteria for pH, plasma metformin or plasma lactate (see text) or due to insufficient data. Numbers of cases based on metformin dose were 1,222 (all available records), 966 (all records based on metformin plasma level), 435 (LA subpopulation), and 312 (MaLA subpopulation). Numbers of cases based on metformin plasma level were 996 (all available records), 435 (all records based on metformin plasma level), 312 (LA subpopulation), and 312 (MaLA subpopulation). For respective reference comparison groups, please refer to Online Supplementary Table 3. Some ORs have wide confidence intervals due to low number of cases and should be interpreted with caution.
